# Supplementary material for: The chemical composition of a new “mica sandwich” foraminiferal species from the East Coast of Korea: Capsammina crassa sp. nov
Source: PeerJ. 2019 Mar 21;7:e6642. doi: 10.7717/peerj.6642 (PMC6431544; doi:10.7717/peerj.6642)
Supplement: Supplemental Information 1 — The area, length (maximum dimension) and width(minimum dimension) of the mica plates of each specimen were measured. ‘plate1’ is the most transparent one of both plates and ‘plate2’ is the translucent to opaque one. The size of agglutinated ring was also measured. ‘ring length’ is the maximum dimension of agglutinated ring, and ‘ring width’ is the minimum dimension of agglutinated ring. ‘ring thickness1’ is the maximum thickness of the ring, and ‘ring thickness2’ is the minimum thickness of the agglutinated ring.The thickness of the lateral side was also measured. ‘thickness1’ is maximum thickness, and ‘thickness2’ is minimum thickness of the lateral side. The average and standard deviation of each measurement were calculated. The average and standard deviation of each measurement are shown. [file peerj-07-6642-s001.xlsx]

## Sheet: TableS2
individual no.	plate1 area (µm2)	plate 1 length	plate1 width	plate2 area (µm2)	plate 2 length	plate2 width	ring length	ring width	ring thickness1	ring thickness2	thickness1	thickness2
1	1250947	1516	992	588731	1157	684	994	891	175	66.8	136	99
2	300763	664	555	552311	879	774	646	590	108	78.9	134	86.1
3	637241	1140	734	688355	1109	816	1264	1032	312	127	187	150
4	417591	901	528	542977	1137	530	901	563	177	33.7	349	119
5	401856	802	564	207870	667	349	651	437	158	69.7	74	35.9
6	599639	2348	606	424190	935	561	910	550	216	56.7	145	83
7	359214	818	629	468389	856	597	954	682	273	90.1	248	76.8
8	502247	951	714	558945	1006	713	823	591	205	116	232	183
9	594800	1049	712	367176	892	563	843	727	214	93.4	195	178
10	292545	789	421	418606	807	654	880	674	264	124	230	180
11	517870	982	761	186799	592	393	778	751	225	105	141	83.1
12	342537	918	405	296842	722	522	673	618	249	90.9	86	66.7
13	140026	472	374	83759	421	243	443	391	155	61.4	102	70
14	224321	591	529	355828	785	589	552	460	138	73.3	70.3	61.8
15	351046	882	513	485057	1109	509	1018	640	456	328	259	155
average	462176	988	603	415056	872	567	822	640	222	101	172	109
stdev.*	260778	448	162	167580	215	155	207	168	85	68.1	79.8	48.6
* Standard deviation												(µm)
