# Supplementary material for: The chemical composition of a new “mica sandwich” foraminiferal species from the East Coast of Korea: Capsammina crassa sp. nov
Source: PeerJ. 2019 Mar 21;7:e6642. doi: 10.7717/peerj.6642 (PMC6431544; doi:10.7717/peerj.6642)
Supplement: Supplemental Information 2 — . The area, length, and width of the mica plates of each specimen were measured. ‘plate1’ is the most transparent one, and ‘plate2’ and ‘plate3’ are translucent to opaque ones. Area, length (maximum dimension), and width (minimum dimension) of each plate were measured. The maximum dimension (ring length), minimum dimension (ring width) and thickness of the agglutinated ring were also measured. ‘ring thickness1’ is maximum thickness of the agglutinated ring, and ‘ring thickness2’ is minimum thickness of the agglutinated ring. Additionally, maximum thickness (thickness1) and minimum thickness (thickness2) in lateral side view were measured. The average and standard deviation of each measurement are shown. [file peerj-07-6642-s002.xlsx]

## Sheet: TableS3
individual no.	plate1 area (µm2)	plate 1 length	plate1 width	plate2 area (µm2)	plate 2 length	plate2 width	plate3 area (µm2)	plate3 length	plate3 width	ring length	ring width	ring thickness1	ring thickness2	thickness1	thickness2
1	568119	1216.8	579	344661	815	597	297011	751	635	973	621	189	74.9	290	62.3
2	598359	2284.97	522	162125	598	293	141472	562	391	717	634	209	95.4	104	45.6
3	313218	1025.8	310	181310	608	361	499666	1128	555	874	661	249	110	193	61.5
4	361316	908.25	346	208736	671	367	690741	1178	691	1046	690	333	153	203	105
5	602169	1167.77	736	212916	596	525	116997	562	259	1083	919	386	266	165	30.7
average	488636	1320.72	499	221950	658	429	349177	836	506	938	705	274	140	191	61
stdev.*	139847	552.513	175	71667	93.4	127	244481	300	179	147	122	83.9	76.2	67.6	27.7
* Standard deviation															(µm)
