# Supplementary material for: The chemical composition of a new “mica sandwich” foraminiferal species from the East Coast of Korea: Capsammina crassa sp. nov
Source: PeerJ. 2019 Mar 21;7:e6642. doi: 10.7717/peerj.6642 (PMC6431544; doi:10.7717/peerj.6642)
Supplement: Supplemental Information 3 [file peerj-07-6642-s003.xlsx]

## Sheet: Feuil1
Pt	Cl+Ix2	O	Si	Ti	Al	Fe	Mn	Mg	Ca	Na	K	P	S	Mineral name
Ind1Pt01	0.173551	57.9781	37.5121	0.0228187	1.31525	0.424417	0.0823063	0.826967	0.0660812	1.12881	0.0452771	0.273404	0.182231	quartz
Ind1Pt02	0.448372	44.6656	17.8641	1.01707	12.6548	10.791	0.179125	6.54322	0.122729	0.759144	4.87957	0.041051	0.0781894	Not identified
Ind1Pt03	1.17222	50.1624	0.341122	2.8244e-05	0.0761548	1.15957	0.30198	0.443619	46.3512	0.127988	0.287275	0.0594997	0.0704971	calcite
Ind1Pt04	0.387964	40.1218	31.0231	0.058607	15.3424	0.649782	0.104065	0.641891	4.04349	7.28218	0.234582	0.0976723	0.11838	plagioclase
Ind1Pt05	0.203239	43.9361	29.2368	0.0247033	14.3877	0.25093	0.103475	1.04218	2.75563	7.71544	0.0854435	0.183841	0.113692	plagioclase
Ind1Pt06	0.248414	52.4428	27.1223	0.0510581	9.60241	0.355988	0.0955576	1.14454	0.11292	1.46671	6.97274	0.236438	0.190479	orthoclase
Ind1Pt07	0.119543	58.1367	23.2654	0.0682424	9.01441	0.477986	0.0948832	1.16867	0.0516214	1.42857	5.7862	0.299647	0.104331	orthoclase
Ind1Pt08	0.319564	42.0515	54.305	0.0692241	1.41478	0.61667	0.133341	0.409213	0.133539	0.328509	0.147216	0.0936687	0.0779638	quartz
Ind1Pt09	0.279808	42.7477	34.5041	0.0738702	11.5198	0.3334	0.0823229	0.666046	0.543577	8.97237	0.228505	0.0880088	0.0655572	albite
Ind1Pt10	0.763089	52.7887	15.0455	12.971	2.81575	0.584139	0.0683517	0.900721	12.8559	1.08211	0.289547	0.111889	0.0636177	sphene
Ind1Pt11	1.37664	46.0606	7.54109	39.644	2.26978	1.47624	0.123272	0.723225	0.337645	0.678686	0.286393	0.0224153	0.0535943	rutile
Ind1Pt12	0.340377	35.6735	37.011	0.118847	11.5848	1.0219	0.138034	0.0859005	0.382234	0.149696	13.4786	0.00126959	0.114797	orthoclase
Ind1Pt13	0.125889	54.7992	23.9923	0.0415123	9.01813	0.231718	0.0473964	1.11974	0.0913097	10.071	0.145438	0.23338	0.118154	albite
Ind1Pt14	1.33182	54.2356	39.5407	0.00311272	1.32412	0.2849	0.122155	0.795325	0.254573	1.42773	0.0501295	0.421929	0.600791	quartz
Ind1Pt15	8.6073	45.1023	31.8329	0.0255763	3.01676	0.871342	0.20388	3.35902	1.80508	2.50877	0.396055	1.17378	3.38237	Sulphured MO?
Ind1Pt16	9.24823	50.1678	29.9829	0.0164114	1.08243	1.00084	0.285087	1.88976	1.91281	2.97555	0.088656	0.715043	3.08119	Sulphured MO?
Ind1Pt17	34.5685	30.7425	7.61386	0.12438	3.24773	1.41722	0.5682	6.6265	4.80702	8.08043	0.343881	2.44216	8.59548	Sulphured MO?
Ind1Pt18	30.5939	30.0041	6.60765	0.13959	2.77863	2.41619	1.49946	5.87352	6.17708	9.15197	0.364379	2.10252	10.2572	Sulphured MO?
Ind1Pt19	0.967467	42.3178	53.7993	0.0300554	1.17625	0.749918	0.278178	0.330193	0.198492	0.179865	0.0828055	0.0383619	0.19919	quartz
Ind1Pt20	4.7128	41.5126	24.8904	0.0922002	13.9861	3.27402	0.0599609	3.51194	1.22548	2.49616	2.9822	0.762982	1.74662	Sulphured MO?
Ind1Pt21	0.315587	47.5067	2.77158	0.114463	1.93475	42.7107	0.160876	1.66113	0.126663	2.05673	0.140008	0.336273	0.251915	Fe(OH)3?
Ind1Pt22	1.09559	54.5218	4.14206	31.0725	2.90399	1.65463	0.0810787	1.69085	0.820549	1.17811	0.614058	0.157268	0.549053	rutile
Ind1Pt23	1.27345	47.3391	22.0422	0.114709	16.6649	2.52792	0.0833081	3.09796	0.242354	0.770933	5.82486	0.0950982	0.36945	sericite?
Ind1Pt24	1.1198	54.9911	3.07826	32.8579	2.93152	1.39703	0.105267	1.30314	0.40922	1.29114	0.58131	0.137721	0.250998	rutile
Ind1Pt25	0.125417	51.0341	45.0152	0.0501835	1.447	0.551285	0.145937	0.593174	0.0812014	0.653898	0.050441	0.180577	0.111708	quartz
Ind1Pt26	0.206402	49.5854	22.0663	0.0908296	14.7762	3.43921	0.15365	4.16392	0.135708	1.03672	3.95534	0.190023	0.225035	sericite?
Ind1Pt27	0.657279	59.2574	7.66569	20.2777	5.54593	2.23409	0.0969582	1.85399	0.164845	1.11223	1.14017	0.123549	0.131768	rutile
Ind1Pt28	0.351529	46.7251	27.9284	0.218908	14.0263	1.43214	0.134012	2.32902	0.434093	1.01059	5.065	0.07087	0.348122	sericite?
Ind2Pt29	8.07214	11.6225	60.1096	0.367276	3.08497	1.36253	1.48794	3.23301	0.896746	3.118	1.19261	4.69052	2.55575	quartz
Ind2Pt30	1.9647	51.7079	29.3824	0.128983	9.63136	0.583374	0.135492	1.14206	0.588393	1.21744	3.11119	0.179335	0.792171	orthoclase?
Ind2Pt31	13.8509	16.9267	42.5836	0.0109117	5.5882	2.81847	3.13317	3.08489	2.26667	9.241	2.2415	1.3979	1.59718	amorphous quartz?
Ind2Pt32	0.291021	55.3399	21.7258	0.125063	13.2395	0.497193	0.192528	1.28028	0.114157	1.50903	5.47349	0.135419	0.163274	phengite
Ind2Pt33	3.61129	4.04224	53.614	0.191044	15.6478	2.58228	0.862263	2.90529	0.298484	1.76826	11.9355	1.58967	2.11777	sericite?
Ind2Pt34	1.27098	67.1171	0.31618	0.00130802	0.363921	0.52676	0.143007	1.2501	28.3004	0.94817	0.175944	0.109756	0.0610879	calcite
Ind2Pt35	1.08975	62.6954	1.00581	0.00729923	0.517869	0.787196	1.01723	1.25998	30.4539	1.22915	0.0957996	0.152328	0.150319	calcite
Ind2Pt36	1.99494	37.8654	0.299542	0.000350371	0.149837	0.889397	0.408971	0.359429	58.311	0.177927	0.235932	0.137667	0.0732336	calcite
Ind2Pt37	0.803294	70.2863	0.907891	0.00315571	0.346926	0.154126	0.116646	1.04138	25.0898	1.19884	0.194228	0.130486	0.0896398	calcite
Ind2Pt38	0.227019	54.0013	41.8836	0.0691816	1.46577	0.484466	0.0854453	0.652695	0.100142	0.752767	0.0565287	0.211472	0.0865757	quartz
Ind2Pt39	0.829996	44.3483	51.3927	0.00624425	1.77824	0.459552	0.233528	0.373422	0.21378	0.317906	0.214507	0.114572	0.0792153	quartz
Ind2Pt40	0.256291	45.6884	23.6533	0.094795	21.1492	0.658264	0.165358	1.43303	0.0468558	0.965888	5.81247	0.0635115	0.0950367	sericite?
Ind2Pt41	0.266231	44.6817	23.268	0.178078	21.2364	0.804344	0.11653	1.56166	0.142758	0.934284	6.75728	0.093427	0.0402616	sericite?
Ind2Pt52	0.652343	49.7956	46.196	0.0402713	1.34417	0.173746	0.210636	0.674167	0.205687	0.625228	0.102366	0.125154	0.120161	quartz
Ind3Pt42	1.32406	62.6237	0.518844	0.0017497	0.458903	0.57185	0.251862	0.905574	32.7759	0.701628	0.235209	0.176683	0.0628592	calcite
Ind3Pt43	1.3476	55.8827	0.204609	0.00133588	0.262809	0.767551	0.325024	0.368475	40.6862	0.376308	0.140166	0.107753	0.115005	calcite
Ind3Pt44	0.890257	39.9842	34.5056	0.00594585	12.7639	0.120898	0.090129	0.969356	0.281984	10.2437	0.140034	0.174275	0.18901	albite
Ind3Pt45	0.876288	55.68	16.4235	7.12997	2.64526	13.6658	0.139479	1.50465	0.36225	1.11927	0.147163	0.447941	0.139279	amorphous quartz?
Ind3Pt46	2.45679	19.8566	2.7642	0	0.0101939	1.69126	0.901769	0	72.948	0	0.332606	0.0402574	0.0783848	calcite
Ind3Pt47	0.379355	32.2219	39.9246	0.186767	12.4344	0.677539	0.230876	0.0939217	0.286782	0.231282	13.3569	0.00306357	0.051569	orthoclase
Ind3Pt48	0.14522	51.5417	28.4394	0.0412471	10.458	0.147059	0.136076	0.708593	0.0639362	1.40164	6.76836	0.0909218	0.0821066	orthoclase
Ind3Pt49	0.776586	69.4076	1.2485	0.00858472	0.699279	0.358314	0.11184	1.52774	23.9381	1.41389	0.239463	0.459972	0.12988	calcite dolomitique
Ind3Pt50	0.180011	50.3425	20.7226	0.239956	18.9205	0.570799	0.117305	1.47271	0.105536	1.17865	5.96572	0.185923	0.0515007	sericite?
Ind3Pt51	0.151089	54.1471	18.874	0.12936	17.6479	0.746041	0.165035	1.65645	0.0485202	1.15629	5.01623	0.260923	0.053069	sericite?
Ind4Pt53	0.211279	44.7259	20.2733	1.71695	10.2464	11.2707	0.291761	3.93592	0.101766	0.957323	6.24687	0.0410583	0.049363	sericite?
Ind4Pt54	0.318349	46.3635	20.6998	1.08498	14.3703	6.13428	0.213502	3.2044	0.174879	1.40839	5.31683	0.623995	0.169923	sericite?
Ind4Pt55	0.929101	68.3509	1.01129	0.000533761	0.627236	0.546206	0.105633	1.55296	25.2673	1.50749	0.240782	0.147636	0.107853	calcite
Ind4Pt56	0.114375	53.4915	26.321	0.0380835	9.88142	0.337265	0.0981784	0.855195	0.0522317	1.27106	7.14513	0.256987	0.152674	orthoclase
Ind4Pt57	0.515527	43.1556	53.4774	0.00869688	1.44398	0.528424	0.0654226	0.390126	0.105088	0.269894	0.0797396	0.0791194	0.0859142	quartz
Ind4Pt58	0.250303	46.5363	19.8699	1.33004	10.2666	10.7609	0.318985	3.93738	0.0957342	0.998896	5.46701	0.123976	0.104655	sericite?
Ind4Pt59	0.202143	54.2434	41.937	0.0400147	1.32714	0.225006	0.0941704	0.612169	0.0882051	0.805187	0.114986	0.225199	0.14619	quartz
Ind4Pt60	5.09416	46.1338	11.7831	0.0108243	22.3144	6.28964	0.115785	3.76619	1.02188	2.8187	0.180624	0.754343	1.10528	verre?
Ind4Pt61	1.64667	48.5717	21.2722	0.118158	17.7501	1.27964	0.0745877	2.53771	0.407743	1.48069	4.34005	0.437883	0.494881	sericite?
Ind4Pt62	1.18881	51.8949	11.1598	0.0341648	21.5457	9.32423	0.145047	2.34038	0.309031	1.52926	0.108167	0.631081	0.198533	verre?
Ind5Pt63	0.101567	52.6568	19.468	0.158486	17.9411	0.881921	0.132669	1.59224	0.0967964	1.62375	5.14707	0.160151	0.0715694	sericite?
Ind5Pt64	0.283506	52.2154	15.2647	0.313365	10.8439	7.64102	0.229404	7.51708	0.282641	1.81324	2.9294	0.397192	0.299879	biotite?
Ind5Pt65	0.293224	29.1188	23.3303	1.0088	13.8504	14.7544	0.292944	8.82264	0.395969	0.199614	7.90132	0.036054	0.0799402	biotite?
Ind5Pt66	0.0340959	43.7113	20.1965	0.0356544	15.1732	11.0618	0.165379	8.08694	0.234726	0.847075	0.291071	0.0791098	0.0832039	oxychlorite?
Ind6Pt67	0.138577	51.8244	20.71	0.0859152	17.3343	1.48677	0.0799223	1.91828	0.0513951	1.17571	4.91218	0.196539	0.116993	sericite?
Ind6Pt68	0.139669	36.7687	27.5024	0.117318	22.7263	2.12366	0.184783	1.66286	0.0628866	0.556496	8.04856	0.0554624	0.0814588	sericite?
Ind6Pt69	0.260224	52.1381	14.1585	0.318331	9.87958	10.1608	0.117348	9.12157	0.151322	1.84408	1.24101	0.442427	0.204434	oxychlorite?
Ind6Pt70	1.04837	5.22414	30.9305	3.08389	14.124	28.1166	0.288076	8.82099	0.403904	0.41352	7.50713	0.215759	0.227566	sericite?
